# Supplementary material
Source: PubMed Central journal article supplement (PMC2793338)
Supplement: NIHMS152556-supplement-1.pdf [file NIHMS152556-supplement-1.pdf]

## Supplementary Online Content

Koo M-S, Levitt JJ, Salisbury DF, Nakamura M, Shenton ME, McCarley RW. A cross-sectional and longitudinal magnetic resonance imaging study of cingulate gyrus gray matter volume abnormalities in first-episode schizophrenia and first-episode affective psychosis. *Arch Gen Psychiatry*. 2008;65(7):746-760.

**eTable 1.** Percentages of Change of Cingulate Gyrus Gray Matter Volume in Patients Subgrouped by Medication Type, Compared With HCs

**eTable 2.** Correlations Between Anterior Cingulate Gyrus Percentages of Volume Change and BPRS Symptom Changes Over Time

**eTable 3.** Analysis of the Medication Good-Responder Patient Subgroups vs the Poor-Responder Subgroups in FESZ and FEAFF Groups

**eFigure 1.** Percentages of Change During 1½ Years in Relative Volumes of the Left and Right Cingulate Gyrus Gray Matter

**eFigure 2.** Paracingulate Sulcus (PCS) Pattern

**Supplemental Text.** Magnetic Resonance Imaging Processing

**eTable 1. Percentages of Change of Cingulate Gyrus Gray Matter Volume in Patients Subgrouped by Medication Type, Compared with HCs**

| Change, % (SED) <sup>a</sup> | FESZ Group (n=17)         |                            | FEAFF Group (n=18)        |                          | HC Group (n=18) | Overall Group Comparison of Percentage of Changes (1-Factor ANOVA by group) <sup>b</sup> |         | Post Hoc Tukey HSD Test                                                       |
|------------------------------|---------------------------|----------------------------|---------------------------|--------------------------|-----------------|------------------------------------------------------------------------------------------|---------|-------------------------------------------------------------------------------|
|                              | +TYP (n = 8) <sup>c</sup> | +ATYP (n = 9) <sup>c</sup> | +MS (n = 10) <sup>d</sup> | -MS (n = 8) <sup>d</sup> |                 | F <sub>6,48</sub>                                                                        | P Value |                                                                               |
| Anterior cingulate           |                           |                            |                           |                          |                 |                                                                                          |         |                                                                               |
| Left                         | -6.06<br>(1.26)           | -4.61<br>(1.34)            | -2.91<br>(0.93)           | -2.48<br>(0.49)          | -0.38 (0.43)    | 7.31                                                                                     | <.001   | FESZ + TYP = FESZ + ATYP < HC;<br>FEAFF + MS = FEAFF - MS = HC <sup>e,f</sup> |
| Right                        | -6.98<br>(1.04)           | -4.98<br>(1.26)            | -1.59<br>(1.36)           | -2.25<br>(0.77)          | -0.46 (0.47)    | 8.05                                                                                     | <.001   | FESZ + TYP = FESZ + ATYP < HC;<br>FEAFF + MS = FEAFF - MS = HC <sup>g,h</sup> |
| Posterior cingulate          |                           |                            |                           |                          |                 |                                                                                          |         |                                                                               |
| Left                         | -1.24<br>(1.31)           | -2.59<br>(0.77)            | 0.31<br>(0.54)            | -1.34<br>(1.06)          | -0.24 (0.39)    | 2.46                                                                                     | .06     | FESZ + TYP = FESZ + ATYP = HC;<br>FEAFF + MS = FEAFF - MS = HC <sup>i,j</sup> |
| Right                        | -1.59<br>(0.93)           | -2.46<br>(0.86)            | -0.98<br>(0.85)           | -0.39<br>(1.17)          | -0.35 (0.31)    | 1.43                                                                                     | .24     | FESZ + TYP = FESZ + ATYP = HC;<br>FEAFF + MS = FEAFF - MS = HC <sup>k,l</sup> |

Abbreviations: +ATY, with atypical neuroleptic treatment without exposure to typical neuroleptics at times 1 and 2 magnetic resonance imaging (MRI); FEAFF, first-episode affective psychosis; FESZ, first-episode schizophrenia; HCs, healthy comparison subjects; +/-MS, with/without mood stabilizer treatment; SED, standard error of the difference; +TYP, with typical neuroleptic treatment.

<sup>a</sup>Calculated as (volume at second MRI - volume at baseline MRI)/(volume at baseline MRI × 100).

<sup>b</sup>Calculated using 1-way analysis of variance (ANOVA) by group for the percentages of change of cingulate gyrus gray matter relative volumes in each region. The groups include the 5 given in the Table (FESZ + TYP, FESZ + ATYP, FEAFF + MS, FEAFF - MS, and HC).

<sup>c</sup>Typical neuroleptics include perphenazine in 6 patients and haloperidol in 2; atypical neuroleptics, olanzapine in 5 patients, risperidone in 2, clozapine in 1, and quetiapine in 1.

<sup>d</sup>Includes lithium or valproic acid. The FEAFF - MS group includes 2 patients who were prescribed mood stabilizers but did not adhere to the treatment.

<sup>e</sup>P = .82 between the FESZ + TYP and FESZ + ATYP groups, P = .001 between the FESZ + TYP and HC groups, and P = .004 between the FESZ + ATYP and HC groups.

<sup>f</sup>P = .90 between the FEAFF + MS and FEAFF - MS groups, P = .12 between the FEAFF + MS and HC groups, and P = .06 between the FEAFF - MS and HC groups.

<sup>g</sup>P = .65 between the FESZ + TYP and FESZ + ATYP, P < .001 between the FESZ + TYP and HC groups, and P = .005 between the FESZ + ATYP and HC groups.

<sup>h</sup>P = .88 between the FEAFF + MS and FEAFF - MS groups, P = .58 between the FEAFF + MS and HC groups, and P = .32 between the FEAFF - MS and HC groups.

<sup>i</sup>P = .76 between the FESZ + TYP and FESZ + ATYP groups, P = .85 between the FESZ + TYP and HC groups, and P = .11 between the FESZ + ATYP and HC groups.

<sup>j</sup> $P = .61$  between the FEAFF + MS and FEAFF – MS groups,  $P = .97$  between the FEAFF + MS and HC groups, and  $P = .85$  between the FEAFF – MS and HC groups.

<sup>k</sup> $P = .94$  between FESZ + TYP and FESZ + ATYP groups,  $P = .73$  between the FESZ + TYP and HC groups, and  $P = .20$  between the FESZ + ATYP and HC groups.

<sup>l</sup> $P = .88$  between the FEAFF + MS and FEAFF – MS groups,  $P > .99$  between the FEAFF + MS and HC groups, and  $P > .99$  between the FEAFF – MS and HC groups.

**eTable 2. Correlations Between Anterior Cingulate Gyrus Percentage of Volume Changes and BPRS Symptom Changes Over Time**

| BPRS                | $\rho$ (P Value)         |                                  |                         |                                  |
|---------------------|--------------------------|----------------------------------|-------------------------|----------------------------------|
|                     | FESZ Group<br>(n = 17)   |                                  | FEAFF Group<br>(n = 18) |                                  |
|                     | Withdrawal<br>Factor     | Anxiety-<br>Depression<br>Factor | Withdrawal<br>Factor    | Anxiety-<br>Depression<br>Factor |
| Subgenual cingulate |                          |                                  |                         |                                  |
| Left                | -0.10 (.71)              | -0.35 (.14)                      | -0.44 (.07)             | -0.32 (.22)                      |
| Right               | -0.11 (.69)              | -0.21 (.46)                      | -0.14 (.59)             | 0.19 (.46)                       |
| Affective cingulate |                          |                                  |                         |                                  |
| Left                | -0.24 (.38)              | -0.22 (.44)                      | 0.26 (.16)              | 0.08 (.77)                       |
| Right               | -0.60 (.02) <sup>a</sup> | -0.05 (.87)                      | -0.22 (.40)             | -0.28 (.29)                      |
| Cognitive cingulate |                          |                                  |                         |                                  |
| Left                | -0.25 (.38)              | -0.16 (.57)                      | -0.08 (.76)             | 0.02 (.93)                       |
| Right               | -0.50 (.06)              | -0.09 (.75)                      | -0.11 (.68)             | 0.33 (.20)                       |
| Posterior cingulate |                          |                                  |                         |                                  |
| Left                | -0.39 (.15)              | 0.07 (.82)                       | 0.12 (.65)              | -0.15 (.57)                      |
| Right               | -0.35 (.20)              | 0.38 (.11)                       | -0.04 (.87)             | -0.15 (.34)                      |

Abbreviations: BPRS, Brief Psychiatric Rating Scale; FEAFF, first-episode affective psychosis; FESZ, first-episode schizophrenia.

<sup>a</sup> $P < .05$ .

**eTable 3. Analysis of the Medication Good-Responder Patient Subgroups vs the Poor-Responder Subgroups in FESZ and FEAFF Groups<sup>a</sup>**

| Mean Changes, % (SED) <sup>b</sup> | FESZ Group (n = 17)           |                               |                                         | FEAFF Group (n = 18)           |                               |                                         |
|------------------------------------|-------------------------------|-------------------------------|-----------------------------------------|--------------------------------|-------------------------------|-----------------------------------------|
|                                    | Good-Responder Subgroup (n=9) | Poor-Responder Subgroup (n=8) | z score (2-Tailed P Value) <sup>c</sup> | Good-Responder Subgroup (n=12) | Poor-Responder Subgroup (n=6) | z Score (2-Tailed P Value) <sup>c</sup> |
| Subgenual cingulate                | -3.85 (1.04)                  | -4.62 (1.55)                  | -0.5 (.63)                              | -5.22 (1.17)                   | -6.22 (1.57)                  | -0.3 (.78)                              |
| Left                               | -2.63 (1.39)                  | -4.36 (1.81)                  | -0.5 (.63)                              | -4.14 (1.03)                   | -8.70 (0.76)                  | -2.6 (.009) <sup>d</sup>                |
| Right                              | -4.66 (1.18)                  | -4.49 (1.83)                  | -0.5 (.63)                              | -4.81 (1.46)                   | -6.22 (2.22)                  | -0.7 (.51)                              |
| Affective cingulate                | -3.74 (0.64)                  | -8.82 (0.99)                  | -3.2 (.001) <sup>e</sup>                | -2.04 (0.97)                   | -2.57 (0.70)                  | -0.8 (.40)                              |
| Left                               | -4.81 (1.42)                  | -7.58 (0.76)                  | -1.2 (.25)                              | -3.65 (1.39)                   | -2.33 (1.02)                  | -0.4 (.71)                              |
| Right                              | -2.80 (1.46)                  | -10.36 (4.74)                 | -3.4 (.001) <sup>e</sup>                | -0.67 (1.28)                   | -2.84 (0.98)                  | -1.2 (.22)                              |
| Cognitive cingulate                | -3.94 (1.54)                  | -6.05 (1.15)                  | -1.0 (.34)                              | -1.87 (0.74)                   | -0.38 (1.25)                  | -1.3 (.19)                              |
| Left                               | -2.56 (1.37)                  | -5.80 (2.13)                  | -1.2 (.258)                             | -1.24 (0.93)                   | -1.54 (1.04)                  | -0.2 (.85)                              |
| Right                              | -5.12 (1.97)                  | -5.54 (1.74)                  | -0.3 (.77)                              | -2.70 (1.38)                   | -0.17 (1.83)                  | -0.9 (.35)                              |
| Posterior cingulate                | -2.42 (0.55)                  | -1.47 (1.05)                  | -0.3 (.773)                             | -0.33 (0.56)                   | -0.92 (0.82)                  | -0.6 (.57)                              |
| Left                               | -2.47 (0.70)                  | -1.37 (1.37)                  | -0.5 (.63)                              | -0.36 (0.59)                   | -1.42 (0.89)                  | -1.4 (.16)                              |
| Right                              | -2.44 (0.85)                  | -1.62 (0.94)                  | -0.8 (.44)                              | -0.99 (0.89)                   | -0.36 (1.02)                  | -0.7 (.51)                              |

Abbreviations: FEAFF, first-episode affective psychosis; FESZ, first-episode schizophrenia; SED, standard error of the difference.

<sup>a</sup>The good-responder subgroup had Brief Psychiatric Rating Scale (BPRS) scores that decreased more than 20 points (20 was derived from a median value to divide the group into 2 similarly sized subgroups); the poor-responder subgroup, BPRS scores that decreased less than 20 points, did not change, or increased.

<sup>b</sup>Calculated as (volume at second image - volume at baseline image)/(volume at baseline image × 100).

<sup>c</sup>The z score was derived from nonparametric Mann-Whitney tests comparing both patient groups because individual groups (n < 13) did not show a normal distribution.

<sup>d</sup>Difference was significant ( $P < .05$ ); however, not significant when applied with Bonferroni correction (0.05/8).

<sup>e</sup>Difference was significant ( $P < .05$ ); also significant when applied with Bonferroni correction (0.05/8).

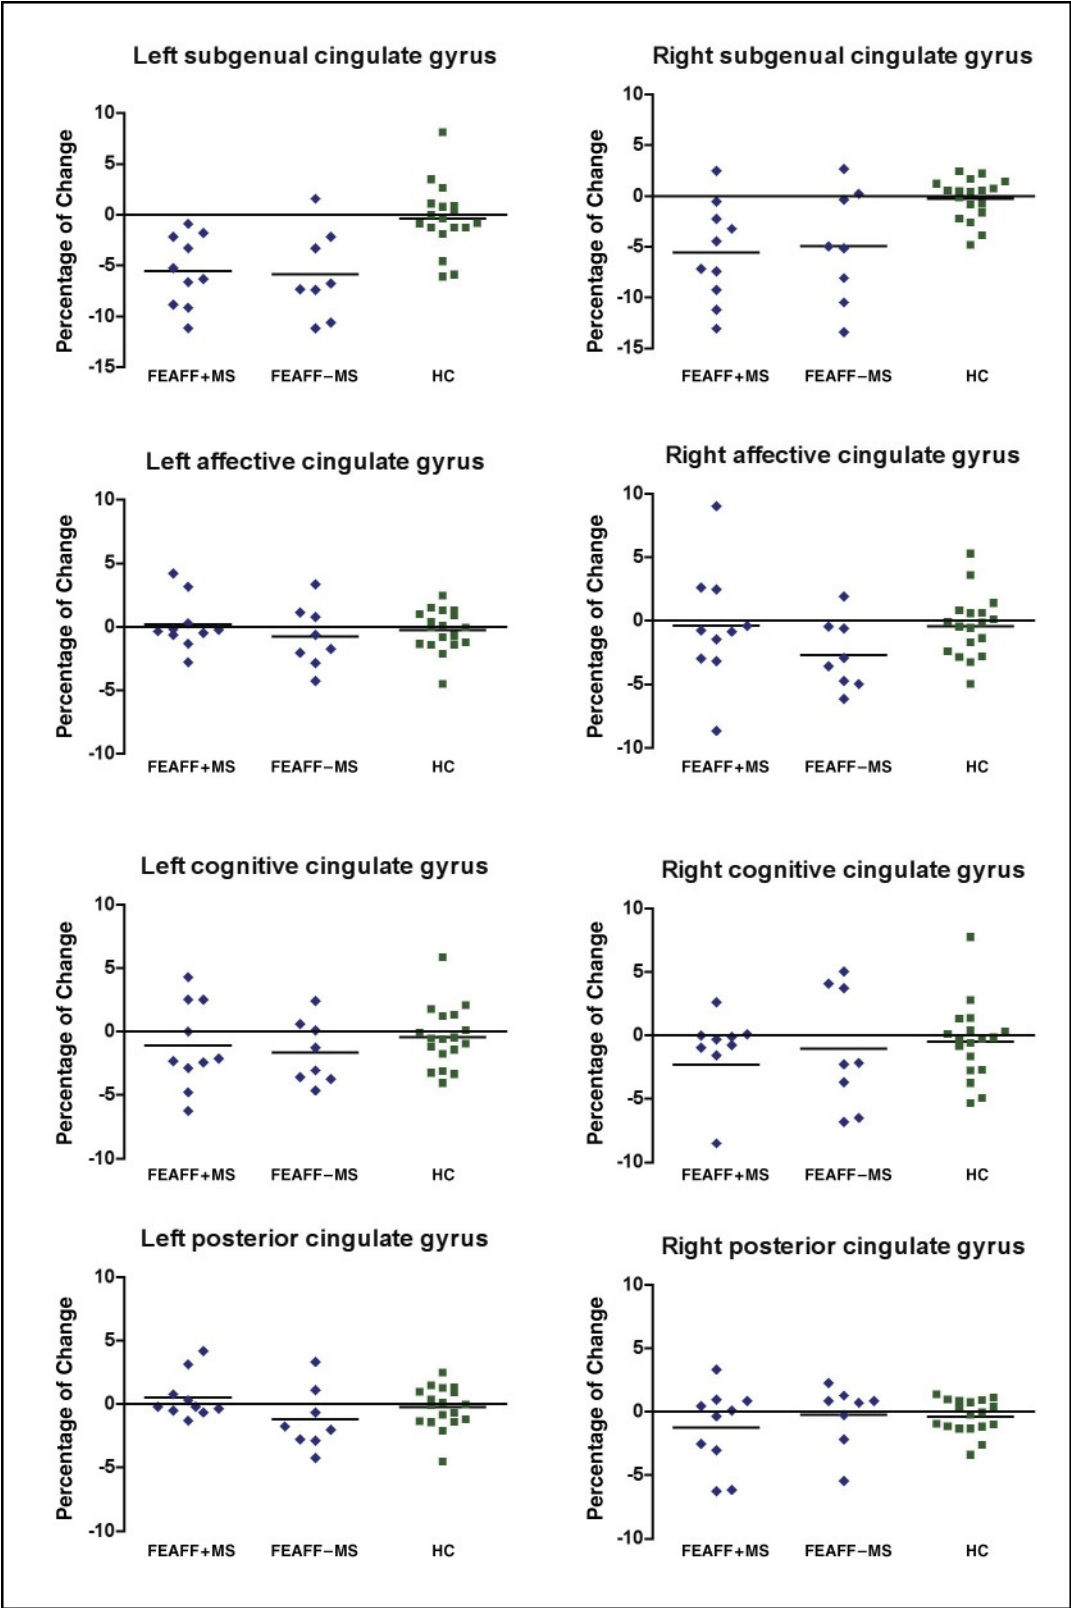

**eFigure 1.** Percentages of change in 1½ years in relative volumes of the left and right cingulate gyrus gray matter in patients with first-episode affective psychosis (FEAFF) (n=18) receiving (+MS) and not receiving mood stabilizers (–MS) (consisting of lithium carbonate and/or valproic acid) and in healthy comparison subjects (HCs) (n=18). The FEAFF – MS group included 2 patients who were prescribed mood stabilizers but did not adhere to treatment. Percentage of change is calculated as (volume at second image – volume at baseline image)/(volume at baseline image × 100). Horizontal line indicates mean. Repeated-measures analysis of variance (ANOVA) of relative volume difference (percentage of change) with group (FEAFF + MS, FEAFF – MS, or HC) as the between-subjects factor and hemisphere (left vs right) and region (subgenual, affective, cognitive, or posterior) as the within-subjects factors revealed a significant main effect for group ( $F_{2,33} = 11.11$ ;  $P < .001$ ) and region ( $F_{3,99} = 11.35$ ;  $P < .001$ ). There was a significant interaction between region and group ( $F_{6,99} = 3.80$ ;  $P = .002$ ). There was no significant effect for hemisphere ( $F_{1,33} = 0.26$ ;  $P = .62$ ), and there were no significant interactions of hemisphere × group ( $F_{2,33} = 0.15$ ;  $P = .86$ ), region × hemisphere ( $F_{3,99} = 0.22$ ;  $P = .81$ ), and region × hemisphere × group ( $F_{6,99} = 1.31$ ;  $P = .26$ ). Follow-up 1-way ANOVA revealed significant differences only in the left ( $F_{2,33} = 9.77$ ;  $P < .001$ ) and right ( $F_{2,33} = 7.45$ ;  $P = .002$ ) subgenual relative volume percentages of change. Post hoc Tukey Honestly Significant Difference (HSD) tests indicated that the left ( $P = .003$ ) and right ( $P = .004$ ) subgenual cingulate volumes percentages of change of FEAFF + MS patients were significantly bigger than those of the HCs, which were not significantly different from those of the FEAFF – MS patients. Also, left ( $P = .003$ ) and right ( $P = .004$ ) subgenual cingulate volumes percentages of change of FEAFF – MS patients were significantly bigger than those of the HCs. Additional repeated-measures ANOVA of relative volume difference (percentage of change) with group (affective psychosis treated with lithium, affective psychosis without lithium treatment, and healthy comparison) as the between-subjects factor and hemisphere (left vs right) and region (subgenual, affective, cognitive, or posterior) as the within-subjects factors revealed a significant main effect for group ( $F_{2,33} = 11.48$ ;  $P < .001$ ) and region ( $F_{3,99} = 7.18$ ;  $P < .001$ ). There was a significant interaction between region and group ( $F_{6,99} = 4.99$ ;  $P < .001$ ). There was no significant effect for hemisphere ( $F_{1,33} = 0.15$ ;  $P = .70$ ), and there were no significant interactions of hemisphere × group ( $F_{2,33} = 2.20$ ;  $P = .13$ ), region × hemisphere ( $F_{3,99} = 1.30$ ;  $P = .28$ ), and region × hemisphere × group ( $F_{6,99} = 0.45$ ;  $P = .84$ ). Follow-up 1-way ANOVA revealed significant differences only in the left ( $F_{2,33} = 11.41$ ;  $P < .001$ ) and right ( $F_{2,33} = 7.55$ ;  $P = .002$ ) subgenual relative volume percentage of changes. Post hoc Tukey HSD tests indicated that the left ( $P = .04$ ) and right ( $P = .03$ ) subgenual cingulate volumes percentage of changes of the FEAFF + lithium patients were significantly bigger than those of the HCs, which were not significantly different from those of the FEAFF – lithium patients (left,  $P = .33$ ; right,  $P = .87$ ). In addition, the left ( $P = .001$ ) and right ( $P = .002$ ) subgenual cingulate volumes percentage of changes of FEAFF – lithium patients were significantly bigger than those of HCs.

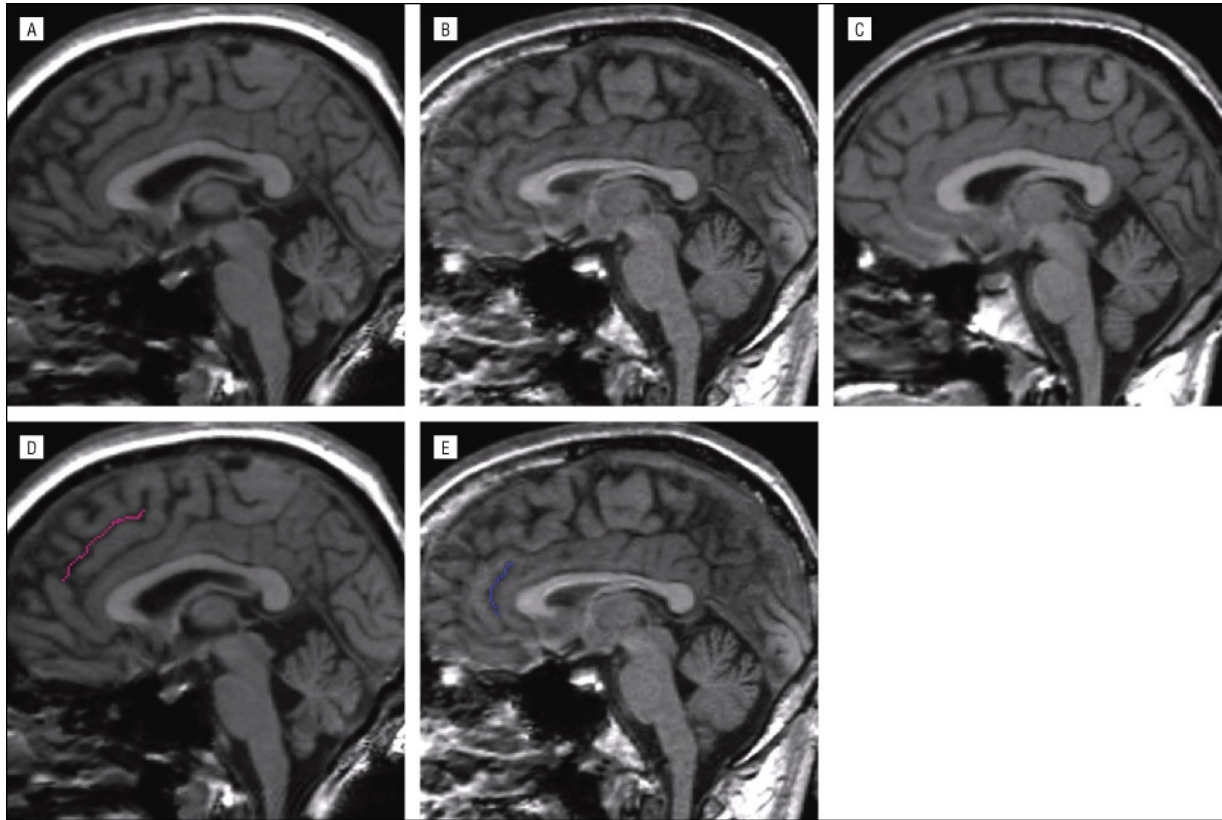

**eFigure 2.** Paracingulate sulcus (PCS) pattern. The magnetic resonance images of the PCS show the distinct PCS patterns evaluated in this study. A through C, The PCS is prominent (A), present (B), and absent (C). D and E, lines have been drawn on upper panel images (A and B, respectively) to indicate the prominent PCS (red line) (D) and a present PCS (blue line) (E).



## Supplemental Text

The magnetic resonance imaging (MRI) protocol used 2 pulse sequences on a 1.5-T MRI system (GE Medical Systems, Milwaukee, Wisconsin). Briefly, a 3-dimensional Fourier-transformed spoiled gradient-recalled (SPGR) acquisition sequence yielded contiguous coronal SPGR images (echo time, 5 ms; repetition time, 35 ms; 1 repetition; nutation angle, 45°; field of view, 24 cm; acquisition matrix,  $256 \times 256 \times 124$ ; voxel dimension,  $0.9375 \times 0.9375 \times 1.5$  mm). Next, a double-echo spin-echo yielded contiguous axial (54 proton-density-weighted and 54 T2-weighted) sections (slices) throughout the brain (echo times, 30 and 80 ms; repetition time, 3000 ms; field of view, 24 cm; an interleaved acquisition with 3-mm section thickness; voxel dimensions,  $0.9375 \times 0.9375 \times 3.0$  mm). Images were realigned using the anterior commissure/posterior commissure line and the sagittal sulcus to correct head tilt and resampled into isotropic voxels ( $0.9375 \text{ mm}^3$ ).
